# Supplementary material for: ZnO/Chitosan Nanocomposite: Ecofriendly Biosynthesis, Characterization and Application for the Removal of Pyridoxine Hydrochloride (Vitamin B6) from Wastewater
Source: Research Square preprint supplement (doi:10.21203/rs.3.rs-3391453/v1), 2023-10-30

# BIOSYNTHESIS OF ZNO/CHITOSAN NANOCOMPOSITE

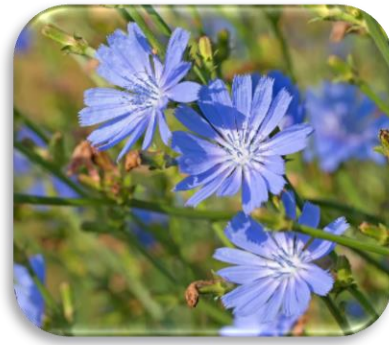

Chicory Extract

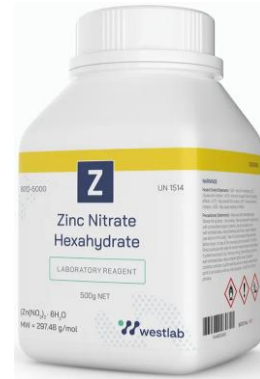

Zinc Nitrate

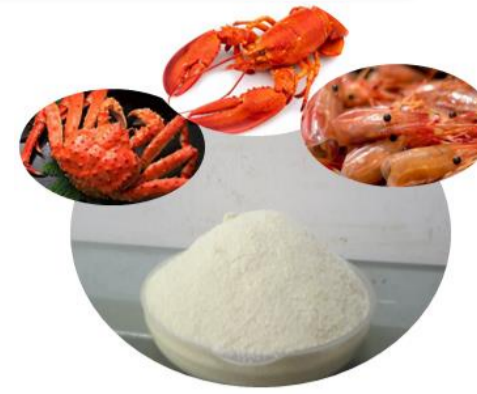

Chitosan

## VARIABLES

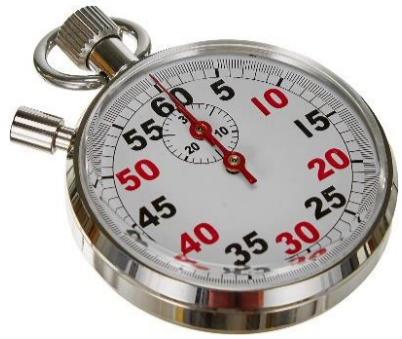

Contact Time

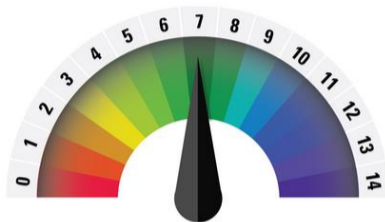

pH Value

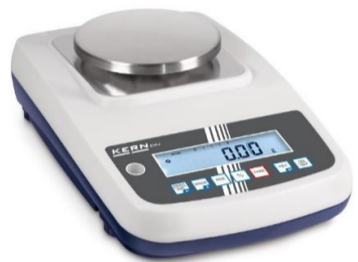

Sorbent Amount

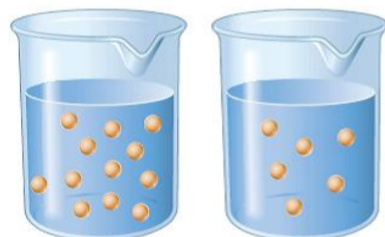

Drug Capacity

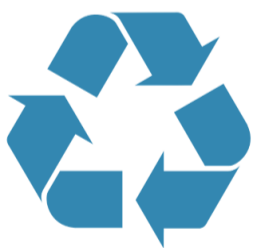

Sorbents Reusability

## CHARACTERIZING

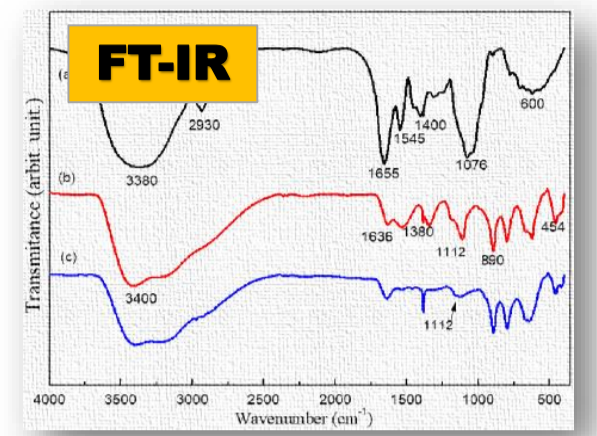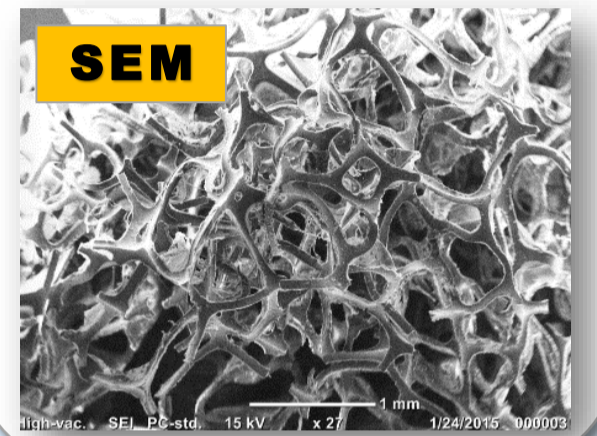

# ZNO/CS NANOCOMPOSITE FOR REMOVAL OF VIT. B6 FROM WATER

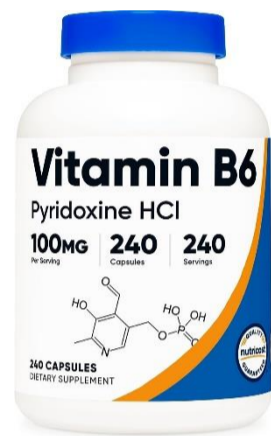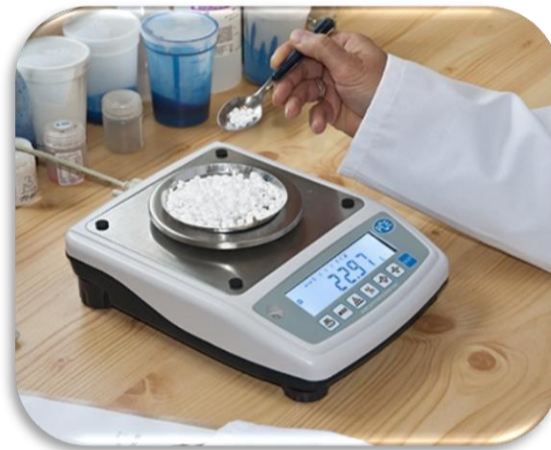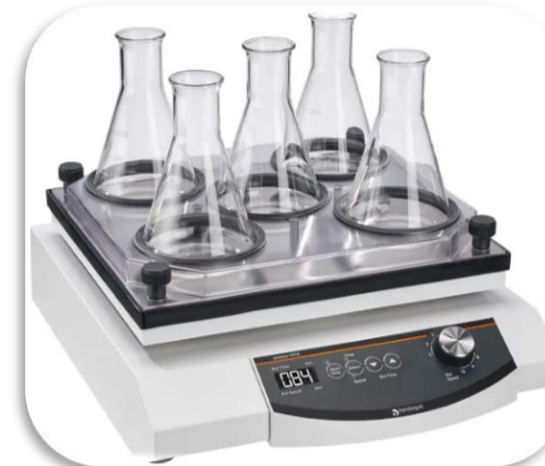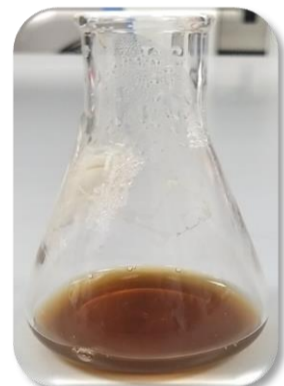

Chicory Plant Extract

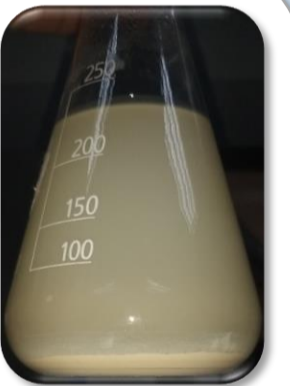

ZnO Nanoparticles

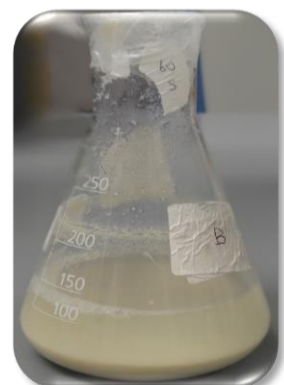

ZnO/Chitosan Nanocomposite

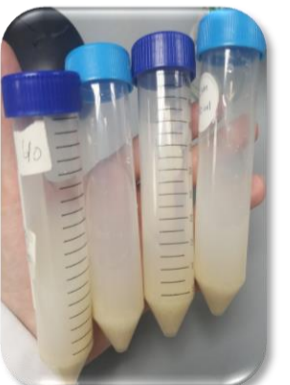

Adsorption Variables

## Spectrophotometry

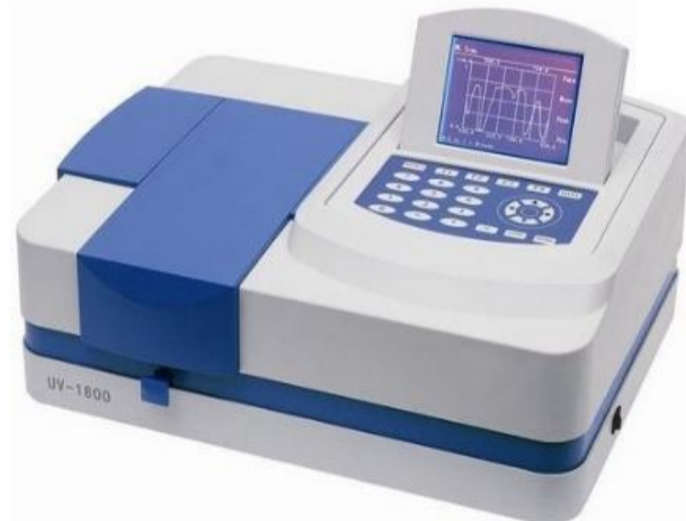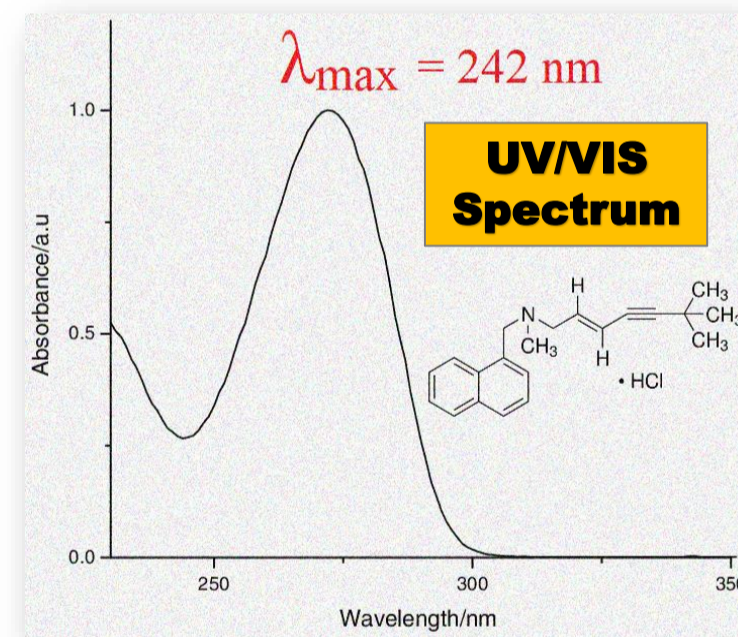

## Adsorption Isotherm

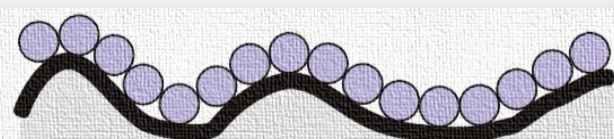

adsorbent

### Langmuir

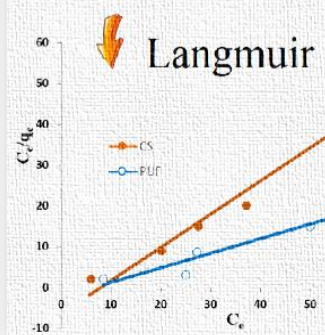

### Freundlich

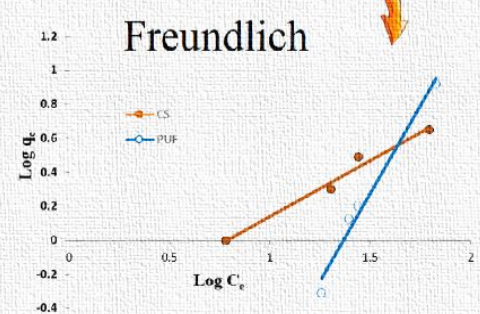

## Kinetic Studies

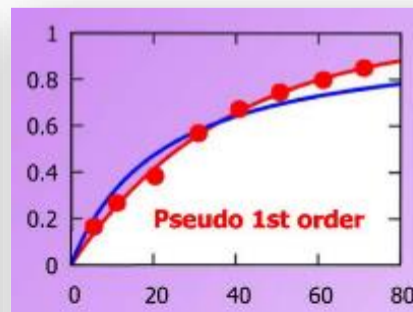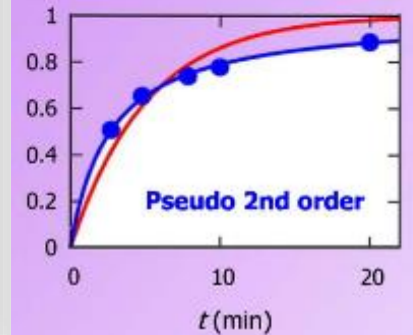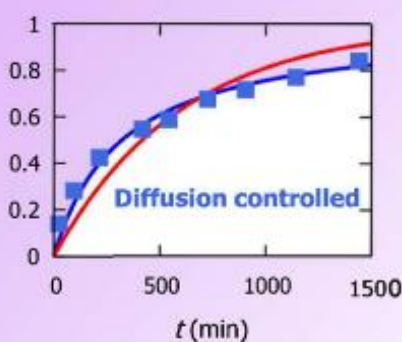

## Thermodynamic Studies

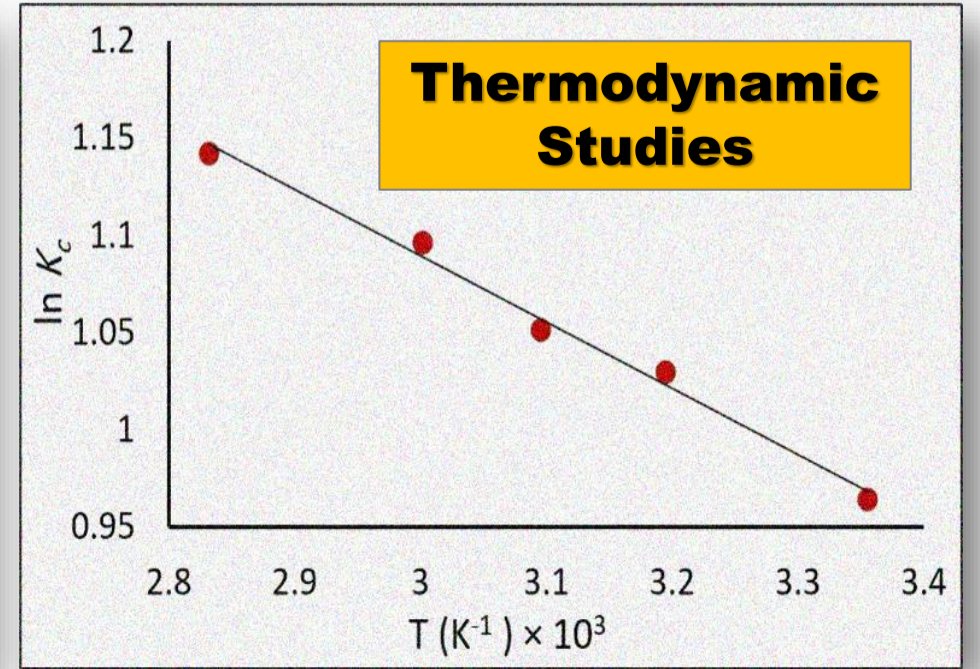

Supplement: Supplementary file 1 [file 1d4b765d6a9e5af2d58fbff9.pdf]
